# Supplementary material for: Pre-hospital factors and survival after out-of-hospital cardiac arrest according to population density, a nationwide study
Source: PubMed Central journal article supplement — Resusc Plus. 2020 Nov 4;4:100036. doi: 10.1016/j.resplu.2020.100036 (PMC8244249; doi:10.1016/j.resplu.2020.100036), 2020-11-04
Supplement: mmc3.pdf [file mmc3.pdf]

## Crude

## Adjusted

**Overall (n=16,335)**

|                                     |                  |                                                                                   |
|-------------------------------------|------------------|-----------------------------------------------------------------------------------|
| Low (<300/km <sup>2</sup> )         | 1 [reference]    |  |
| Medium (300–1,499/km <sup>2</sup> ) | 1.34 [1.05–1.70] |  |
| High (1,500–3,000/km <sup>2</sup> ) | 1.65 [1.30–2.10] |  |
| Very high (>3,000/km <sup>2</sup> ) | 2.53 [1.96–3.25] |  |

|                  |                                                                                     |
|------------------|-------------------------------------------------------------------------------------|
| 1 [reference]    |  |
| 1.43 [1.12–1.83] |  |
| 1.87 [1.46–2.39] |  |
| 2.83 [2.18–3.67] |  |

**Residential location (n=11,681)**

|                                     |                  |                                                                                   |
|-------------------------------------|------------------|-----------------------------------------------------------------------------------|
| Low (<300/km <sup>2</sup> )         | 1 [reference]    |  |
| Medium (300–1,499/km <sup>2</sup> ) | 1.16 [0.85–1.58] |  |
| High (1,500–3,000/km <sup>2</sup> ) | 1.27 [0.93–1.72] |  |
| Very high (>3,000/km <sup>2</sup> ) | 2.04 [1.48–2.82] |  |

|                  |                                                                                     |
|------------------|-------------------------------------------------------------------------------------|
| 1 [reference]    |  |
| 1.32 [0.96–1.81] |  |
| 1.55 [1.13–2.12] |  |
| 2.48 [1.78–3.45] |  |

**Public location (n=3,737)**

|                                     |                  |                                                                                   |
|-------------------------------------|------------------|-----------------------------------------------------------------------------------|
| Low (<300/km <sup>2</sup> )         | 1 [reference]    |  |
| Medium (300–1,499/km <sup>2</sup> ) | 2.05 [1.35–3.10] |  |
| High (1,500–3,000/km <sup>2</sup> ) | 3.00 [1.99–4.53] |  |
| Very high (>3,000/km <sup>2</sup> ) | 4.12 [2.67–6.35] |  |

|                  |                                                                                     |
|------------------|-------------------------------------------------------------------------------------|
| 1 [reference]    |  |
| 1.81 [1.18–2.79] |  |
| 2.73 [1.78–4.17] |  |
| 3.78 [2.41–5.91] |  |

**Witnessed (n=8,700)**

|                                     |                  |                                                                                   |
|-------------------------------------|------------------|-----------------------------------------------------------------------------------|
| Low (<300/km <sup>2</sup> )         | 1 [reference]    |  |
| Medium (300–1,499/km <sup>2</sup> ) | 1.52 [1.14–2.01] |  |
| High (1,500–3,000/km <sup>2</sup> ) | 1.95 [1.47–2.59] |  |
| Very high (>3,000/km <sup>2</sup> ) | 2.78 [2.07–3.74] |  |

|                  |                                                                                     |
|------------------|-------------------------------------------------------------------------------------|
| 1 [reference]    |  |
| 1.57 [1.17–2.10] |  |
| 2.13 [1.59–2.85] |  |
| 3.12 [2.30–4.25] |  |

**Bystander CPR (n=6,343)**

|                                     |                  |                                                                                   |
|-------------------------------------|------------------|-----------------------------------------------------------------------------------|
| Low (<300/km <sup>2</sup> )         | 1 [reference]    |  |
| Medium (300–1,499/km <sup>2</sup> ) | 1.41 [1.04–1.91] |  |
| High (1,500–3,000/km <sup>2</sup> ) | 2.03 [1.50–2.75] |  |
| Very high (>3,000/km <sup>2</sup> ) | 2.63 [1.90–3.65] |  |

|                  |                                                                                     |
|------------------|-------------------------------------------------------------------------------------|
| 1 [reference]    |  |
| 1.47 [1.08–2.00] |  |
| 2.14 [1.57–2.92] |  |
| 2.74 [1.96–3.84] |  |

**EMS response time <10 min. (n=6,846)**

|                                     |                  |                                                                                   |
|-------------------------------------|------------------|-----------------------------------------------------------------------------------|
| Low (<300/km <sup>2</sup> )         | 1 [reference]    |  |
| Medium (300–1,499/km <sup>2</sup> ) | 1.70 [1.13–2.56] |  |
| High (1,500–3,000/km <sup>2</sup> ) | 1.93 [1.28–2.89] |  |
| Very high (>3,000/km <sup>2</sup> ) | 3.10 [2.04–4.71] |  |

|                  |                                                                                     |
|------------------|-------------------------------------------------------------------------------------|
| 1 [reference]    |  |
| 1.70 [1.12–2.59] |  |
| 2.03 [1.33–3.08] |  |
| 3.37 [2.18–5.20] |  |

**Shockable rhythm (n=4,453)**

|                                     |                  |                                                                                     |
|-------------------------------------|------------------|-------------------------------------------------------------------------------------|
| Low (<300/km <sup>2</sup> )         | 1 [reference]    |  |
| Medium (300–1,499/km <sup>2</sup> ) | 1.19 [0.86–1.65] |  |
| High (1,500–3,000/km <sup>2</sup> ) | 1.58 [1.15–2.19] |  |
| Very high (>3,000/km <sup>2</sup> ) | 2.30 [1.63–3.26] |  |

|                  |                                                                                       |
|------------------|---------------------------------------------------------------------------------------|
| 1 [reference]    |  |
| 1.21 [0.86–1.70] |  |
| 1.80 [1.28–2.52] |  |
| 2.78 [1.93–4.01] |  |

0.8 1.5 2.5 3.5 4.5 5.5

Odds Ratio [95% CI]

0.8 1.5 2.5 3.5 4.5 5.5

Odds Ratio [95% CI]
