# Supplementary material for: Pre-hospital factors and survival after out-of-hospital cardiac arrest according to population density, a nationwide study
Source: PubMed Central journal article supplement — Resusc Plus. 2020 Nov 4;4:100036. doi: 10.1016/j.resplu.2020.100036 (PMC8244249; doi:10.1016/j.resplu.2020.100036), 2020-11-04
Supplement: mmc6.pdf [file mmc6.pdf]

Crude

Adjusted

### Survival upon hospital arrival

#### Day time (n=7,519)

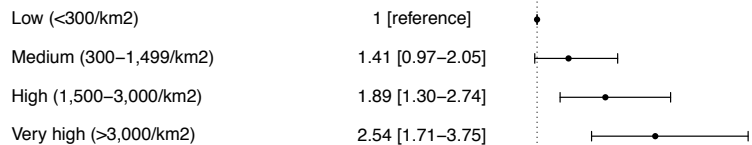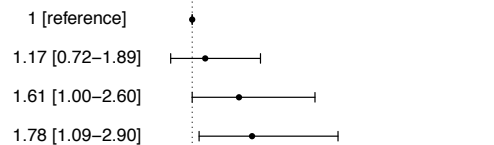

#### Evening time (n=5,706)

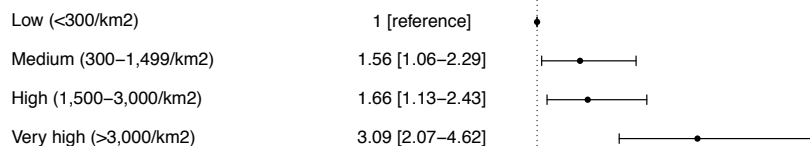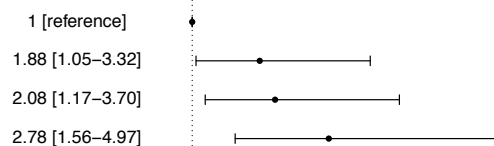

#### Night time (n=3,278)

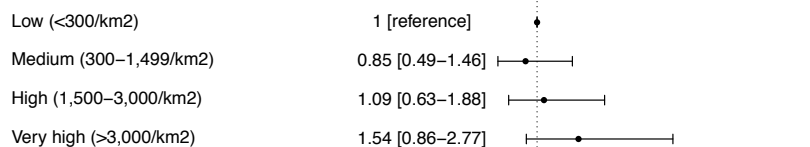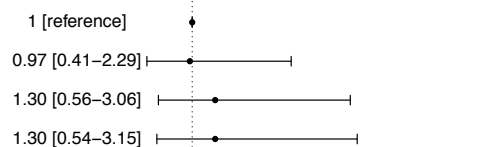

### 30-day survival

#### Day time (n=7,519)

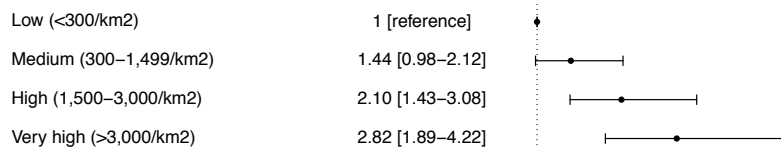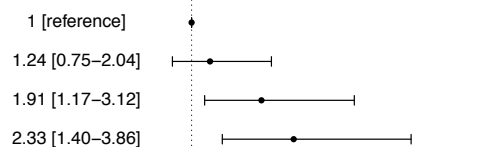

#### Evening time (n=6,001)

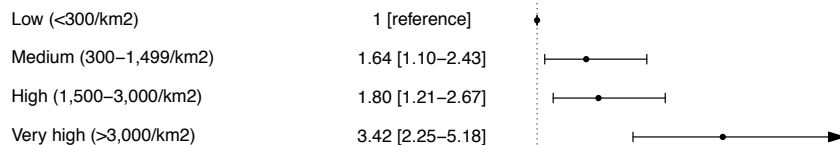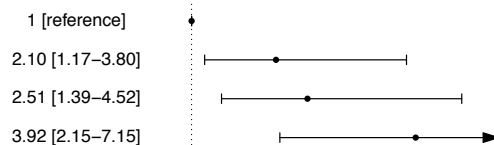

#### Night time (n=3,627)

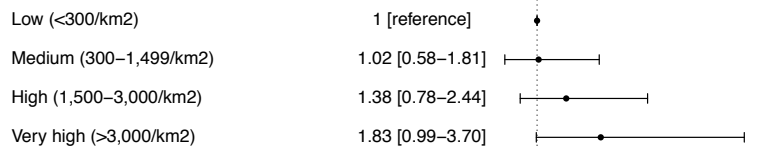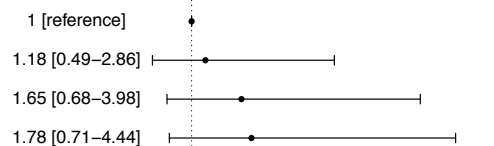

Odds Ratio [95% CI]

Odds Ratio [95% CI]

Odds Ratio [95% CI]

Odds Ratio [95% CI]
