# Supplementary figures and images for: Pre-hospital factors and survival after out-of-hospital cardiac arrest according to population density, a nationwide study
Source: PubMed Central journal article supplement — Resusc Plus. 2020 Nov 4;4:100036. doi: 10.1016/j.resplu.2020.100036 (PMC8244249; doi:10.1016/j.resplu.2020.100036), 2020-11-04

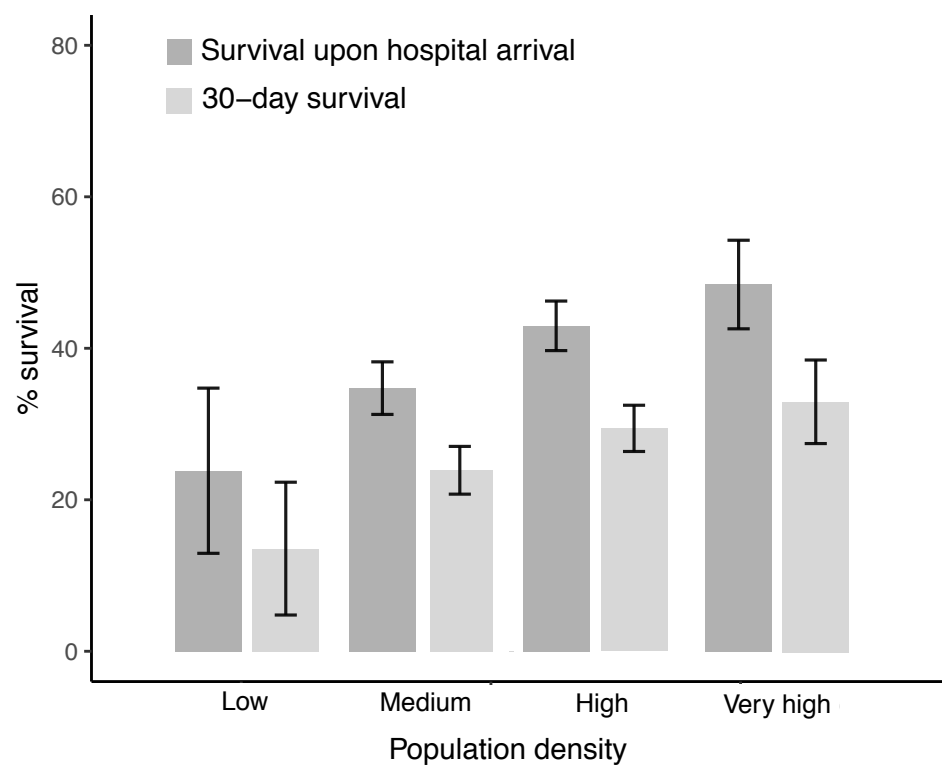

Supplement: mmc4.pdf [file mmc4.pdf]

**Crude****Adjusted****Day time (n=7,519)**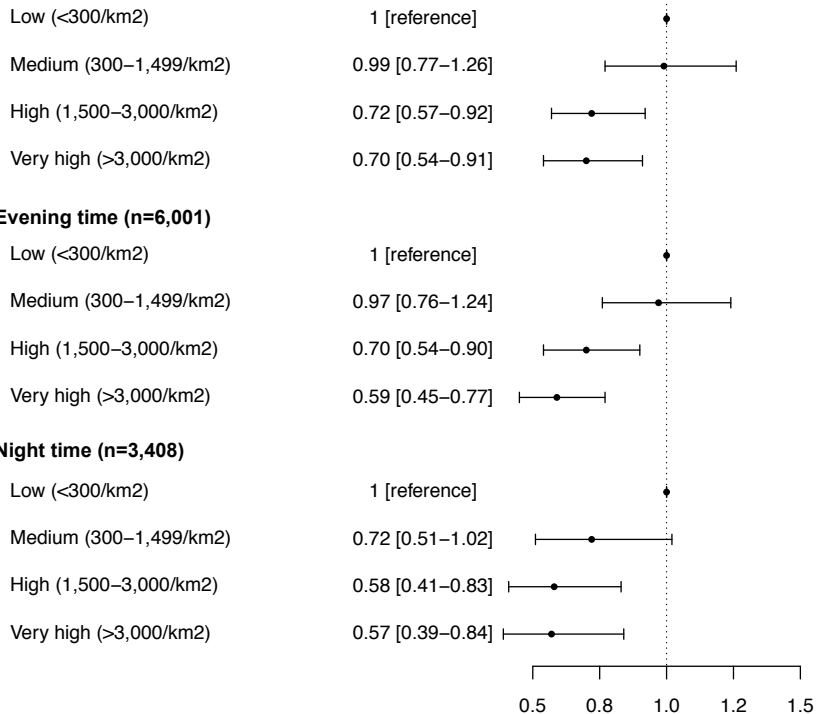**Evening time (n=6,001)**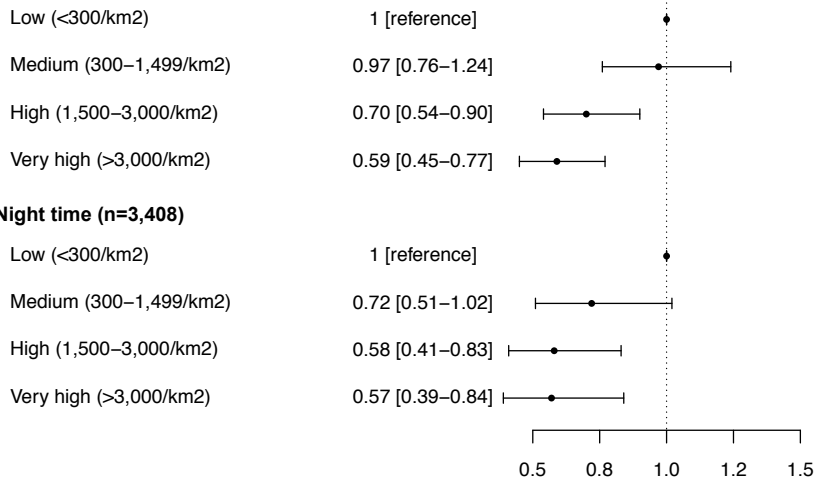**Night time (n=3,408)**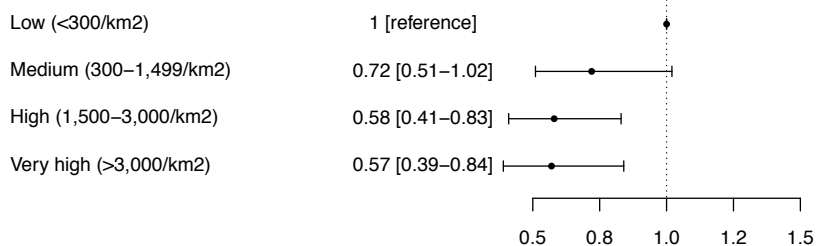

Odds Ratio [95% CI]

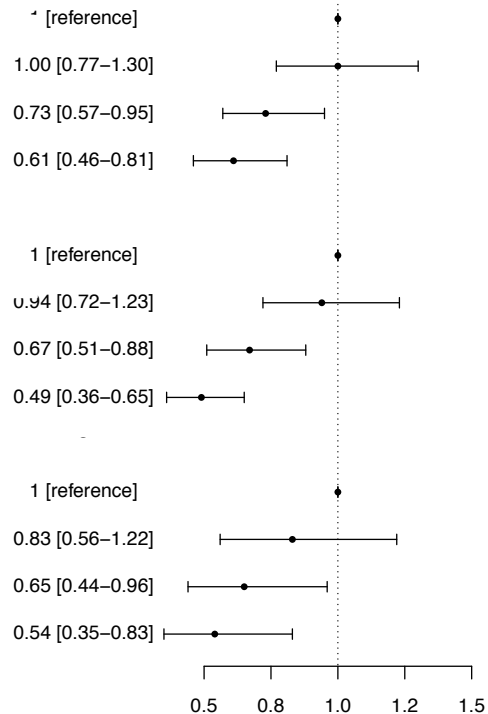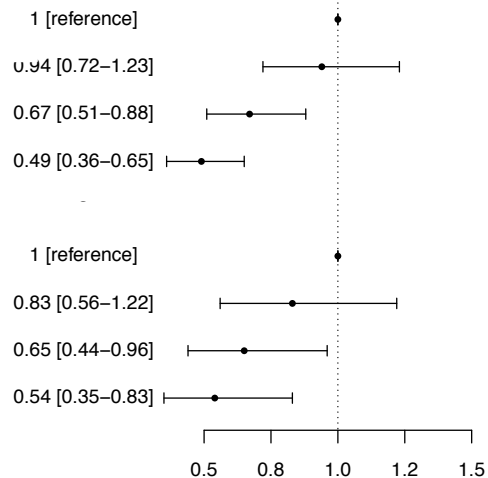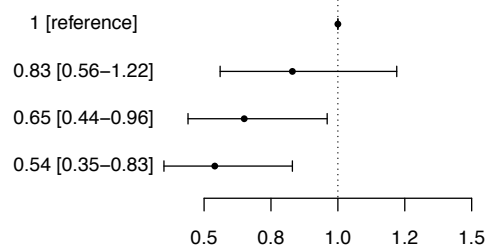

Odds Ratio [95% CI]

Supplement: mmc5.pdf [file mmc5.pdf]
